# Supplementary material
Source: publisher figshare collection journal article supplement (https://tandf.figshare.com/articles/dataset/_/5558635)
Supplement: Supplementary file 1 [file 1]

Archive with 3 entries (3 files):
- tafz_a_1379358_sm9620.xlsx
- tafz_a_1379358_sm9619.pdf
- tafz_a_1379358_sm9618.pdf
