# Supplementary material
Source: publisher figshare collection journal article supplement (https://tandf.figshare.com/articles/dataset/_/5558635)
Supplement: Supplementary file 1 [file 1 › tafz_a_1379358_sm9618.pdf]

## Supplementary Information

### Genetic structure of wild and domesticated grasscutters (*Thryonomys swinderianus*) from south-western Nigeria

Kayode Coker, Abosede O Omonona, Olusegun A Fagbohun, Cortney Pylant and James Austin

*African Zoology* 2017, 52(3): 155–162. DOI: 10.1080/15627020.2017.1379358

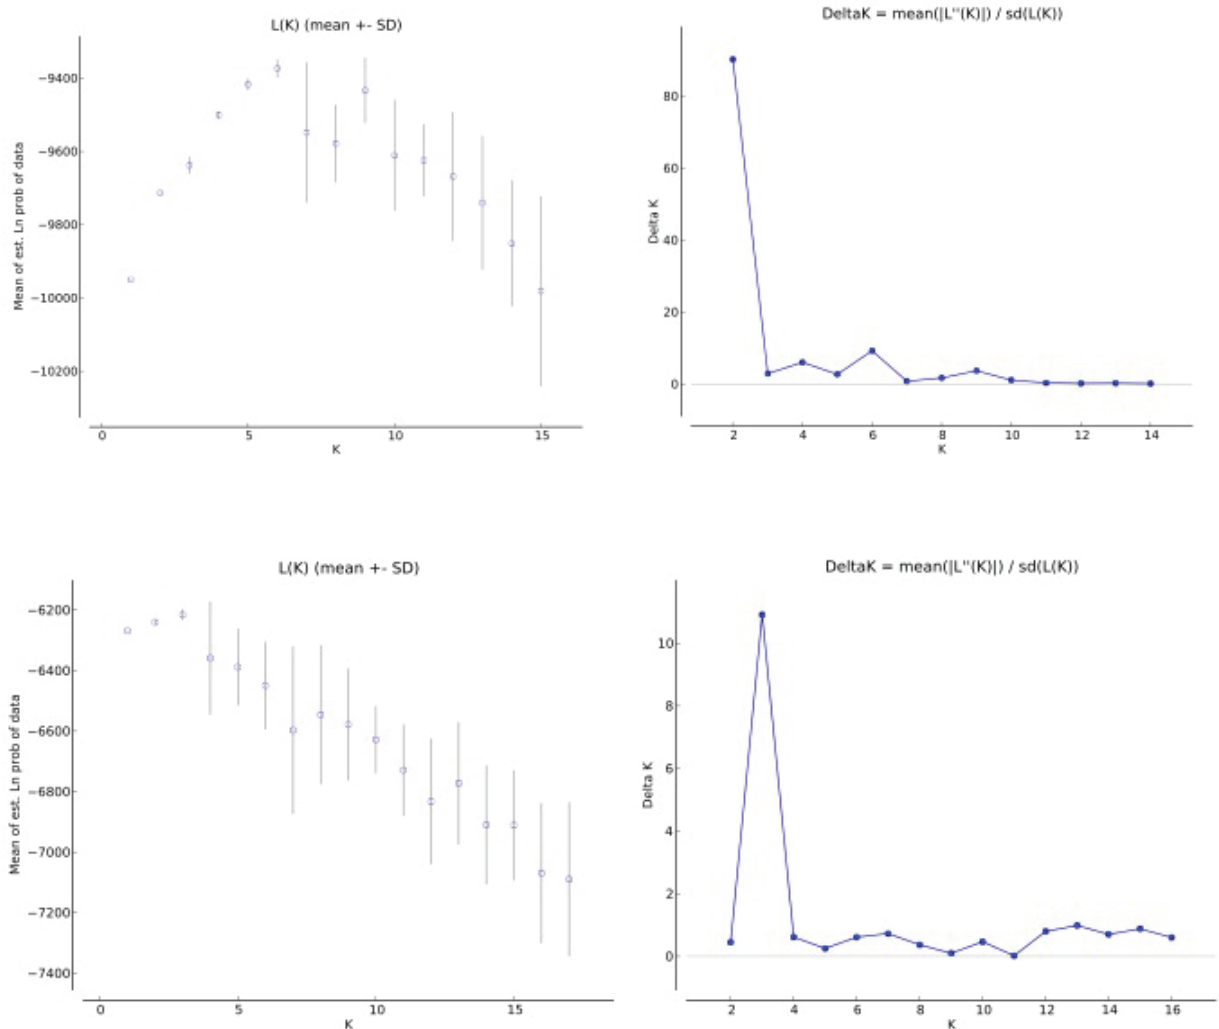

**Figure S1:** Graph of mean log likelihood of STRUCTURE analyses examining  $K = 1$  to  $K = 15$  for (top) wild and farmed samples, and (bottom) wild samples only. Delta  $K$  plots represent the second-order derivation on the variance of the maximum likelihood estimation of the model given a specific  $K$
