# Supplementary material
Source: publisher figshare collection journal article supplement (https://tandf.figshare.com/articles/dataset/_/5558635)
Supplement: Supplementary file 1 [file 1 › tafz_a_1379358_sm9619.pdf]

## Supplementary Information

### Genetic structure of wild and domesticated grasscutters (*Thryonomys swinderianus*) from south-western Nigeria

Kayode Coker, Abosede O Omonona, Olusegun A Fagbohun, Cortney Pylant and James Austin  
*African Zoology* 2017, 52(3): 155–162. DOI: 10.1080/15627020.2017.1379358

#### Material S1:

Power analysis to determine the utility of the multi-locus microsatellite data to detect heterogeneity at observed levels of differentiation ( $F_{ST}$ ) was evaluated using POWSIM software (<http://www.zoologi.su.se/~ryman/>).

This software simulates multiple populations that have drifted apart (no gene flow) for  $N$  generations and tests the hypothesis of genetic homogeneity using Fisher's exact tests. We used the empirical allele frequencies from all 11 loci for simulations.

Sampling from the simulated populations was done using empirical samples sizes from wild grasscutter samples. We explored a variety of  $n_e$  and  $t$  (generation) values to explore the expected differentiation based on drift alone.

Results indicate that the power to detect significant differentiation is low if true  $N_e$  is small and the number of generations since divergence is very small. Neither of which is likely in rodents.  $F_{ST}$  approaching observed levels would require very large  $n_e$  ( $> 5\,000$ ) and greater than 100 generations of divergence.

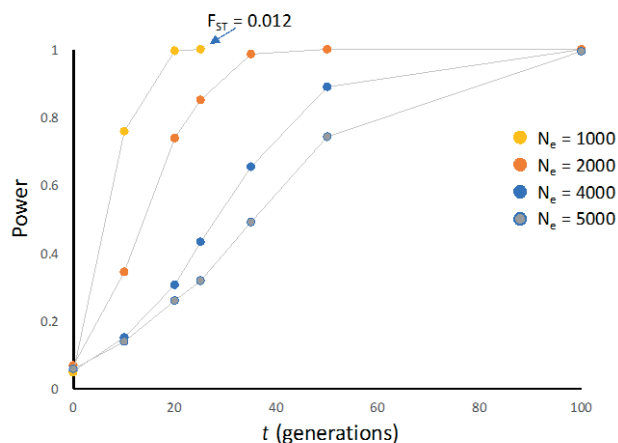

Table of results for power analyses across generation times and  $n_e$

| $F_{st}$ | Power | $n_e$ | Generations |
|----------|-------|-------|-------------|
| 0        | 0.049 | 1000  | 0           |
| 0.005    | 0.759 | 1000  | 10          |
| 0.01     | 0.996 | 1000  | 20          |
| 0.0124   | 1     | 1000  | 25          |
| 0        | 0.068 | 2000  | 0           |
| 0.0025   | 0.345 | 2000  | 10          |
| 0.0012   | 0.739 | 2000  | 20          |
| 0.0063   | 0.852 | 2000  | 25          |
| 0.0087   | 0.987 | 2000  | 35          |
| 0.0124   | 0.999 | 2000  | 50          |
| 0        | 0.052 | 4000  | 0           |
| 0.0012   | 0.151 | 4000  | 10          |
| 0.0025   | 0.307 | 4000  | 20          |
| 0.0031   | 0.432 | 4000  | 25          |
| 0.0044   | 0.654 | 4000  | 35          |
| 0.0062   | 0.89  | 4000  | 50          |
| 0.0124   | 1     | 4000  | 100         |
| 0        | 0.058 | 5000  | 0           |
| 0.001    | 0.139 | 5000  | 10          |
| 0.002    | 0.259 | 5000  | 20          |
| 0.0025   | 0.318 | 5000  | 25          |
| 0.0035   | 0.491 | 5000  | 35          |
| 0.005    | 0.743 | 5000  | 50          |
| 0.01     | 0.995 | 5000  | 100         |
