# Supplementary material
Source: publisher figshare collection journal article supplement (https://tandf.figshare.com/articles/dataset/_/5558635)
Supplement: Supplementary file 1 [file 1 › tafz_a_1379358_sm9620.xlsx]

## Sheet: Summary for Wild pop
Supplementary Information
Genetic structure of wild and domesticated grasscutters (Thryonomys swinderianus) from south-western Nigeria Kayode Coker, Abosede O Omonona, Olusegun A Fagbohun, Cortney Pylant and James Austin African Zoology 2017, 52(3): 155–162. DOI: 10.1080/15627020.2017.1379358
Table S1: Summary statistics for wild grasscutters (Thryonomys swinderianus) genotypes
Population	Tsw12	Tsw08	Tsw07	Tsw 11	Tsw 32	Tsw 18	Tsw 33	Tsw 31	Tsw 13	Tsw 06	Tsw 05	Mean
Guinea Savanna
GS_AB, n=13
Na	5	9	9	14	9	7	7	9	5	5	4	7.55
Ne	3.02	6.9	6.38	9.94	4.9	5.28	2.73	6.5	2.79	2.99	2.74	4.92
Ar	3.919	6.193	6.101	7.626	5.546	5.312	4.446	6.071	3.827	3.859	3.313	5.11027
Ho	0.85	0.62	0.69	1	0.77	0.92	0.46	0.69	0.54	0.77	0.5	0.71
He	0.7	0.89	0.88	0.94	0.83	0.84	0.66	0.88	0.67	0.69	0.66	0.78
p(HWE)	0.34	0.01	0.07	1	0.64	0.44	0.04	0.18	0.05	0.39	0.45
GS_TD, n= 13
Na	5	13	7	13	9	10	9	10	6	6	3	8.27
Ne	3.8	7.86	4.69	8.67	5.73	4.45	7.35	6.76	4.02	3.84	2.77	5.45
Ar	4.16	7.136	5.037	7.236	5.91	5.441	6.474	6.269	4.357	4.611	2.957	5.41709
Ho	0.69	0.62	0.77	0.85	0.92	0.69	0.23	0.77	0.85	0.69	0.77	0.71
He	0.77	0.91	0.82	0.92	0.86	0.81	0.9	0.89	0.78	0.77	0.67	0.83
p(HWE)	0.2	0.01	0.58	0.24	0.88	0.24	0.00*	0.13	0.17	0.47	1
Derived Savanna
DS_AD, n= 6
Na	3	6	4	9	6	3	7	8	5	3	3	5.18
Ne	1.67	4.5	2.78	8	4.8	2.38	6.55	7.2	4.17	1.95	3	4.27
Ar	2.818	5.485	4	7.955	5.5	3	6.591	7.273	5	2.833	3	4.85955
Ho	0.5	0.5	1	0.67	0.83	0.4	0.33	0.83	0.8	0.5	0.83	0.66
He	0.44	0.85	0.71	0.96	0.86	0.64	0.92	0.94	0.84	0.53	0.73	0.77
p(HWE)	1	0.08	0.43	0.03	0.41	0.36	0.00*	0.4	0.35	0.52	0.67
DS_IS, n= 15
Na	5	15	5	14	7	12	10	9	6	6	3	8.36
Ne	3.17	11.84	3.88	11.25	5.17	6	7.63	4.95	3.75	3.63	2.76	5.82
Ar	3.928	7.939	4.128	7.724	5.152	6.061	6.559	5.395	4.167	4.322	2.95	5.30227
Ho	0.6	0.87	0.79	0.8	0.8	0.73	0.53	0.8	0.8	0.73	0.67	0.74
He	0.71	0.95	0.77	0.94	0.83	0.86	0.9	0.83	0.76	0.75	0.66	0.81
p(HWE)	0.36	0.4	0.72	0.19	0.01	0.29	0.00*	0.77	1	0.83	1
Rain Forest
RF_AS, n= 19
Na	6	11	7	15	9	8	12	10	8	8	4	8.91
Ne	3.14	5.6	3.92	10.17	5.09	5.82	5.64	5.01	5.09	4.01	1.98	5.04
Ar	3.914	5.781	4.442	7.296	5.268	5.543	6.024	5.345	5.229	4.755	2.698	5.11773
Ho	0.68	0.79	0.68	0.9	0.95	0.84	0.42	0.84	0.9	0.84	0.32	0.74
He	0.7	0.84	0.77	0.93	0.83	0.85	0.85	0.82	0.83	0.77	0.51	0.79
p(HWE)	0.01	0.36	0.06	0.63	0.44	0.97	0.00*	0.64	0.99	0.95	0.05
RF_KI, n= 9
Na	5	8	5	10	3	6	6	7	6	6	3	5.91
Ne	3.12	5.4	3.12	6	2.79	4.91	4.77	6.48	4.63	4.15	1.41	4.25
Ar	3.928	6.048	4.339	6.783	2.976	5.312	5.108	6.029	4.961	4.905	2.373	4.79655
Ho	0.78	0.56	0.63	0.78	0.22	0.33	0.44	0.89	0.78	0.89	0.33	0.6
He	0.72	0.86	0.73	0.88	0.68	0.84	0.84	0.9	0.83	0.8	0.31	0.76
p(HWE)	0.79	0.01	0.42	0.22	0.01	0.00*	0.01	0.25	0.74	0.87	1
RF_OA, n= 6
Na	3	9	7	8	5	5	5	6	6	6	3	5.73
Ne	1.67	8	5.14	7.2	3.27	2.57	4.5	4.8	5.14	4.8	2.32	4.49
Ar	2.818	7.955	6.303	7.273	4.5	4.485	4.939	5.621	5.636	5.5	2.833	5.26027
Ho	0.5	0.67	0.67	0.83	0.5	0.67	0	1	0.83	0.67	0.83	0.65
He	0.44	0.96	0.88	0.94	0.76	0.67	0.85	0.86	0.88	0.86	0.62	0.79
p(HWE)	1	0.04	0.21	0.4	0.17	0.4	0.00*	0.84	0.33	0.41	0.39
RF_OL, n= 10
Na	4	9	6	12	6	6	7	8	8	7	3	6.91
Ne	2.6	7.41	5.41	10	3.92	4	3.85	5.26	5.88	5.26	2.17	5.07
Ar	3.262	6.729	5.318	7.842	4.676	4.651	5.184	5.768	5.923	5.45	2.758	5.23282
Ho	0.4	0.5	0.8	1	0.5	1	0.5	0.9	0.8	0.8	0.6	0.71
He	0.65	0.91	0.86	0.95	0.78	0.79	0.78	0.85	0.87	0.85	0.57	0.81
p(HWE)	0.05	0.01	0.65	1	0.03	0.9	0.06	0.57	0.44	0.3	1
RF_OO, n= 6
Na	4	6	7	8	5	5	7	7	7	5	3	5.82
Ne	2.88	4.8	5.14	6.55	4	4	5.14	6.55	5.54	3.6	2.32	4.59
Ar	3.818	5.621	6.303	7.136	4.667	4.667	6.303	6.591	6.318	4.652	2.985	5.36918
Ho	0.83	0.5	0.83	1	1	0.5	0.5	0.67	1	1	0.67	0.77
He	0.71	0.86	0.88	0.92	0.82	0.82	0.88	0.92	0.89	0.79	0.62	0.83
p(HWE)	0.48	0.02	0.2	1	1	0.2	0.04	0.14	1	0.79	1
RF-OW, n = 7
Na	3	6	5	10	6	6	4	6	5	6	3	5.46
Ne	1.82	5.14	3.79	8.91	4.26	5.16	2.97	4.5	3.5	3.63	1.56	4.11
Ar	2.868	5.636	4.652	8.022	5.121	5.504	3.648	5.485	4.363	4.857	2.648	4.80036
Ho	0.43	0.5	1	0.86	0.57	0.86	0.14	0.67	0.71	0.71	0.43	0.63
He	0.48	0.88	0.8	0.96	0.82	0.87	0.71	0.85	0.77	0.78	0.39	0.76
p(HWE)	0.44	0.06	1	0.34	0.31	0.89	0.00*	0.43	0.72	1	1
Swamp/Mangrove Forest
SMF_EP, n = 22
Na	4	15	6	10	5	6	9	6	7	7	3	7.09
Ne	3.4	9.09	4.02	6.33	3.21	2.32	4.75	3.49	4.3	3.75	2.24	4.26
Ar	3.654	7.03	4.299	5.793	3.587	3.49	5.286	4.021	4.942	4.673	2.67	4.495
Ho	0.55	0.71	0.36	0.59	0.57	0.48	0.41	0.62	0.81	0.71	0.62	0.59
He	0.72	0.91	0.77	0.86	0.71	0.58	0.81	0.73	0.79	0.75	0.57	0.75
p(HWE)	0.02	0.02	0.00*	0.00*	0.27	0.06	0.00*	0.19	0.82	0.18	0.13
SMF-MW, n= 13
Na	4	10	5	9	6	6	9	6	8	6	3	6.55
Ne	2.66	7.19	2.15	6.26	4.51	5.28	5.05	2.97	4.51	3.76	2.43	4.25
Ar	3.168	6.424	3.524	6.009	4.8	5.143	5.9	4.013	5.179	4.549	2.783	4.68109
Ho	0.69	0.85	0.46	1	0.54	0.62	0.5	0.62	0.85	0.85	0.54	0.68
He	0.65	0.9	0.56	0.87	0.81	0.84	0.84	0.69	0.81	0.76	0.61	0.76
p(HWE)	0.4	0.04	0.04	0.47	0.03	0.07	0.00*	0.58	0.01	0.2	0.33
n-Sample Size, Na-Number of Alleles, Ne-Number of Effective Alleles, Ar-Allelic richness, Ho- Observed Heterozygosity, He-Expected Heterozygosity, p(HWE)-P values of Hardy-Weinberg equilibrium, *- Significant at 95%(0.05) confidence limit, **- Statistical significance after sequential Bonferroni correction

## Sheet: Summary for both wild&domestic
Supplemental File 2. Diversity statistics of individual loci by population.
Population	Tsw12	Tsw08	Tsw07	Tsw 11	Tsw 32	Tsw 18	Tsw 33	Tsw 31	Tsw 13	Tsw 06	Tsw 05	Mean
Wild populations
Guinea Savanna
GS_AB, n=13
Na	5	9	9	14	9	7	7	9	5	5	4	7.55
Ne	3.02	6.9	6.38	9.94	4.9	5.28	2.73	6.5	2.79	2.99	2.74	4.92
Ar	3.919	6.193	6.101	7.626	5.546	5.312	4.446	6.071	3.827	3.859	3.313	5.11027
Ho	0.85	0.62	0.69	1	0.77	0.92	0.46	0.69	0.54	0.77	0.5	0.71
He	0.7	0.89	0.88	0.94	0.83	0.84	0.66	0.88	0.67	0.69	0.66	0.78
p(HWE)	0.34	0.01	0.07	1	0.64	0.44	0.04	0.18	0.05	0.39	0.45
GS_TD, n= 13
Na	5	13	7	13	9	10	9	10	6	6	3	8.27
Ne	3.8	7.86	4.69	8.67	5.73	4.45	7.35	6.76	4.02	3.84	2.77	5.45
Ar	4.16	7.136	5.037	7.236	5.91	5.441	6.474	6.269	4.357	4.611	2.957	5.41709
Ho	0.69	0.62	0.77	0.85	0.92	0.69	0.23	0.77	0.85	0.69	0.77	0.71
He	0.77	0.91	0.82	0.92	0.86	0.81	0.9	0.89	0.78	0.77	0.67	0.83
p(HWE)	0.2	0.01	0.58	0.24	0.88	0.24	0.00*	0.13	0.17	0.47	1
Derived Savanna
DS_AD, n= 6
Na	3	6	4	9	6	3	7	8	5	3	3	5.18
Ne	1.67	4.5	2.78	8	4.8	2.38	6.55	7.2	4.17	1.95	3	4.27
Ar	2.818	5.485	4	7.955	5.5	3	6.591	7.273	5	2.833	3	4.85955
Ho	0.5	0.5	1	0.67	0.83	0.4	0.33	0.83	0.8	0.5	0.83	0.66
He	0.44	0.85	0.71	0.96	0.86	0.64	0.92	0.94	0.84	0.53	0.73	0.77
p(HWE)	1	0.08	0.43	0.03	0.41	0.36	0.00*	0.4	0.35	0.52	0.67
DS_IS, n= 15
Na	5	15	5	14	7	12	10	9	6	6	3	8.36
Ne	3.17	11.84	3.88	11.25	5.17	6	7.63	4.95	3.75	3.63	2.76	5.82
Ar	3.928	7.939	4.128	7.724	5.152	6.061	6.559	5.395	4.167	4.322	2.95	5.30227
Ho	0.6	0.87	0.79	0.8	0.8	0.73	0.53	0.8	0.8	0.73	0.67	0.74
He	0.71	0.95	0.77	0.94	0.83	0.86	0.9	0.83	0.76	0.75	0.66	0.81
p(HWE)	0.36	0.4	0.72	0.19	0.01	0.29	0.00*	0.77	1	0.83	1
Rain Forest
RF_AS, n= 19
Na	6	11	7	15	9	8	12	10	8	8	4	8.91
Ne	3.14	5.6	3.92	10.17	5.09	5.82	5.64	5.01	5.09	4.01	1.98	5.04
Ar	3.914	5.781	4.442	7.296	5.268	5.543	6.024	5.345	5.229	4.755	2.698	5.11773
Ho	0.68	0.79	0.68	0.9	0.95	0.84	0.42	0.84	0.9	0.84	0.32	0.74
He	0.7	0.84	0.77	0.93	0.83	0.85	0.85	0.82	0.83	0.77	0.51	0.79
p(HWE)	0.01	0.36	0.06	0.63	0.44	0.97	0.00*	0.64	0.99	0.95	0.05
RF_KI, n= 9
Na	5	8	5	10	3	6	6	7	6	6	3	5.91
Ne	3.12	5.4	3.12	6	2.79	4.91	4.77	6.48	4.63	4.15	1.41	4.25
Ar	3.928	6.048	4.339	6.783	2.976	5.312	5.108	6.029	4.961	4.905	2.373	4.79655
Ho	0.78	0.56	0.63	0.78	0.22	0.33	0.44	0.89	0.78	0.89	0.33	0.6
He	0.72	0.86	0.73	0.88	0.68	0.84	0.84	0.9	0.83	0.8	0.31	0.76
p(HWE)	0.79	0.01	0.42	0.22	0.01	0.00*	0.01	0.25	0.74	0.87	1
RF_OA, n= 6
Na	3	9	7	8	5	5	5	6	6	6	3	5.73
Ne	1.67	8	5.14	7.2	3.27	2.57	4.5	4.8	5.14	4.8	2.32	4.49
Ar	2.818	7.955	6.303	7.273	4.5	4.485	4.939	5.621	5.636	5.5	2.833	5.26027
Ho	0.5	0.67	0.67	0.83	0.5	0.67	0	1	0.83	0.67	0.83	0.65
He	0.44	0.96	0.88	0.94	0.76	0.67	0.85	0.86	0.88	0.86	0.62	0.79
p(HWE)	1	0.04	0.21	0.4	0.17	0.4	0.00*	0.84	0.33	0.41	0.39
RF_OL, n= 10
Na	4	9	6	12	6	6	7	8	8	7	3	6.91
Ne	2.6	7.41	5.41	10	3.92	4	3.85	5.26	5.88	5.26	2.17	5.07
Ar	3.262	6.729	5.318	7.842	4.676	4.651	5.184	5.768	5.923	5.45	2.758	5.23282
Ho	0.4	0.5	0.8	1	0.5	1	0.5	0.9	0.8	0.8	0.6	0.71
He	0.65	0.91	0.86	0.95	0.78	0.79	0.78	0.85	0.87	0.85	0.57	0.81
p(HWE)	0.05	0.01	0.65	1	0.03	0.9	0.06	0.57	0.44	0.3	1
RF_OO, n= 6
Na	4	6	7	8	5	5	7	7	7	5	3	5.82
Ne	2.88	4.8	5.14	6.55	4	4	5.14	6.55	5.54	3.6	2.32	4.59
Ar	3.818	5.621	6.303	7.136	4.667	4.667	6.303	6.591	6.318	4.652	2.985	5.36918
Ho	0.83	0.5	0.83	1	1	0.5	0.5	0.67	1	1	0.67	0.77
He	0.71	0.86	0.88	0.92	0.82	0.82	0.88	0.92	0.89	0.79	0.62	0.83
p(HWE)	0.48	0.02	0.2	1	1	0.2	0.04	0.14	1	0.79	1
RF-OW, n = 7
Na	3	6	5	10	6	6	4	6	5	6	3	5.46
Ne	1.82	5.14	3.79	8.91	4.26	5.16	2.97	4.5	3.5	3.63	1.56	4.11
Ar	2.868	5.636	4.652	8.022	5.121	5.504	3.648	5.485	4.363	4.857	2.648	4.80036
Ho	0.43	0.5	1	0.86	0.57	0.86	0.14	0.67	0.71	0.71	0.43	0.63
He	0.48	0.88	0.8	0.96	0.82	0.87	0.71	0.85	0.77	0.78	0.39	0.76
p(HWE)	0.44	0.06	1	0.34	0.31	0.89	0.00*	0.43	0.72	1	1
Swamp/Mangrove Forest
SMF_EP, n = 22
Na	4	15	6	10	5	6	9	6	7	7	3	7.09
Ne	3.4	9.09	4.02	6.33	3.21	2.32	4.75	3.49	4.3	3.75	2.24	4.26
Ar	3.654	7.03	4.299	5.793	3.587	3.49	5.286	4.021	4.942	4.673	2.67	4.495
Ho	0.55	0.71	0.36	0.59	0.57	0.48	0.41	0.62	0.81	0.71	0.62	0.59
He	0.72	0.91	0.77	0.86	0.71	0.58	0.81	0.73	0.79	0.75	0.57	0.75
p(HWE)	0.02	0.02	0.00*	0.00*	0.27	0.06	0.00*	0.19	0.82	0.18	0.13
SMF-MW, n= 13
Na	4	10	5	9	6	6	9	6	8	6	3	6.55
Ne	2.66	7.19	2.15	6.26	4.51	5.28	5.05	2.97	4.51	3.76	2.43	4.25
Ar	3.168	6.424	3.524	6.009	4.8	5.143	5.9	4.013	5.179	4.549	2.783	4.68109
Ho	0.69	0.85	0.46	1	0.54	0.62	0.5	0.62	0.85	0.85	0.54	0.68
He	0.65	0.9	0.56	0.87	0.81	0.84	0.84	0.69	0.81	0.76	0.61	0.76
p(HWE)	0.4	0.04	0.04	0.47	0.03	0.07	0.00*	0.58	0.01	0.2	0.33
Domesticated populations
FC, n=22
Na	4	9	4	9	7	6	5	7	8	6	3	6.18
Ne	1.47	5.6	3.34	4.96	4.82	2.46	4.23	3.9	2.88	4	2.95	3.69
Ar	2.472	5.437	3.735	5.401	4.797	3.531	4.333	4.676	4.193	4.166	2.963	4.15491
Ho	0.32	0.91	0.77	0.86	0.82	0.59	0.46	0.77	0.55	0.59	0.68	0.67
He	0.33	0.84	0.72	0.82	0.81	0.61	0.78	0.76	0.67	0.77	0.68	0.71
p(HWE)	0.54	0.56	0.52	0.11	0.4	0.91	0.02	0.6	0.1	0.26	0.54
IA, n=19
Na	5	12	4	10	8	7	10	9	5	7	3	7.27
Ne	1.77	8.7	3.02	7.85	4.85	4.03	4.75	6.94	2.85	3.34	2.9	4.64
Ar	3.06	6.866	3.463	6.423	5.317	4.631	5.543	6.071	3.737	4.243	2.963	4.75609
Ho	0.37	0.68	0.58	0.79	0.79	0.74	0.53	0.9	0.63	0.74	0.68	0.68
He	0.45	0.91	0.69	0.9	0.82	0.77	0.81	0.88	0.67	0.72	0.67	0.75
p(HWE)	0.09	0.07	0.58	0.36	0.31	0.88	0.00*	0.65	0.23	0.85	0.94
OF, n=16
Na	3	8	5	10	7	6	7	7	5	5	3	6
Ne	1.14	4.74	3.18	7.31	5.02	4.03	4.3	4.88	3.3	3.88	2.83	4.06
Ar	1.625	5.308	3.788	6.335	4.945	4.651	5.064	5.035	3.887	4.15	2.945	4.33936
Ho	0.13	0.88	0.81	0.81	0.94	0.63	0.5	0.88	0.69	0.75	0.75	0.71
He	0.12	0.82	0.71	0.89	0.83	0.78	0.79	0.82	0.72	0.77	0.67	0.72
p(HWE)	1	0.33	0.17	0.36	0.61	0.42	0.01	0.22	0.64	0.53	0.15
UI, n=15
Na	5	8	5	8	7	7	6	7	4	4	3	5.82
Ne	4.21	6.25	3.31	4.89	4.33	4.64	4.25	3.54	2.26	1.87	1.31	3.71
Ar	4.345	5.79	4.138	5.176	5.048	4.861	4.527	4.677	3.031	2.831	2.053	4.22518
Ho	0.87	0.67	0.83	0.87	0.93	0.87	0.53	0.8	0.6	0.6	0.2	0.71
He	0.79	0.87	0.73	0.82	0.8	0.81	0.79	0.74	0.58	0.48	0.25	0.7
p(HWE)	0.32	0.00*	0.7	0.65	0.59	0.04	0.08	0.07	0.36	0.81	0.21
AW, n=6
Na	3	3	4	5	3	3	6	5	5	5	3	4.09
Ne	2.32	2.67	3.79	3.79	2.88	2.88	4.5	3.6	3.79	4.5	2.67	3.4
Ar	2.985	3	3.985	4.788	3	3	5.485	4.652	4.788	4.818	2.985	3.95327
Ho	0.5	0.5	0.83	0.83	0.5	0.83	0.33	0.83	0.83	1	0.83	0.71
He	0.57	0.63	0.74	0.74	0.65	0.65	0.78	0.72	0.74	0.78	0.63	0.69
p(HWE)	0.21	0.33	0.42	0.58	0.45	0.34	0.00**	0.14	1	0.88	0.65
GM, n=5
Na	2	5	4	3	4	3	4	5	5	3	3	3.73
Ne	1.47	3.85	3.33	2.63	2.94	2.17	2.94	3.13	3.57	1.85	2.38	2.75
Ar	2	5	4	3	4	3	4	5	5	3	3	3.72727
Ho	0.4	1	0.6	0.6	0.8	0.8	0.4	0.4	0.6	0.4	0.8	0.62
He	0.32	0.74	0.7	0.62	0.66	0.54	0.66	0.68	0.72	0.46	0.58	0.61
p(HWE)	1	0.34	0.19	0.11	0.75	1	0.11	0.05	0.05	0.33	0.62
IL, n=5
Na	3	5	3	5	5	5	3	6	3	6	3	4.27
Ne	2.27	3.85	2.78	4.17	3.57	4.17	2.27	5	2.17	5	2.78	3.46
Ar	3	5	3	5	5	5	3	6	3	6	3	4.27273
Ho	0.4	1	0.4	1	0.6	0.6	0.4	1	0.4	0.8	1	0.69
He	0.56	0.74	0.64	0.76	0.72	0.76	0.56	0.8	0.54	0.8	0.64	0.68
p(HWE)	0.24	0.9	0.11	0.85	0.47	0.35	0.24	0.61	0.62	0.15	0.7
n-Sample Size, Na-Number of Alleles, Ne-Number of Effective Alleles, Ar-Allelic richness, Ho- Observed Heterozygosity, He-Expected Heterozygosity, p(HWE)-P values of Hardy-Weinberg equilibrium, *- Significant at 95%(0.05) confidence limit, **- Statistical significance after sequential Bonferroni correction
